# Supplementary material for: Antibacterial Ingredients and Modes of the Methanol-Phase Extract from the Fruit of Amomum villosum Lour
Source: MDPI journal article supplement (doi:10.3390/plants13060834), 2024-03-14
Supplement: s1 [file s1]

## Supplementary Materials

**Table S1.** The major altered metabolic pathways in *S. aureus* GIM1.441 treated by Fraction 2 of *A. villosum* Lour.

| Metabolic Pathway                                         | Gene ID       | Fold<br>Change | Gene Description                                                                               |
|-----------------------------------------------------------|---------------|----------------|------------------------------------------------------------------------------------------------|
| Valine, leucine and<br>isoleucine biosynthesis            | B4602_RS11645 | 4.692          | Acetolactate synthase AlsS                                                                     |
|                                                           | B4602_RS10775 | 0.447          | Ketol-acid reductoisomerase                                                                    |
|                                                           | B4602_RS10780 | 0.390          | 2-isopropylmalate synthase                                                                     |
|                                                           | B4602_RS10800 | 0.394          | Threonine ammonia-lyase IlvA                                                                   |
|                                                           | B4602_RS07310 | 2.450          | Bifunctional threonine ammonia-lyase/L-serine ammonia-lyase TdcB                               |
| Biosynthesis of various<br>other secondary<br>metabolites | B4602_RS00415 | 2.968          | Bifunctional transcriptional regulator/O-phospho-L-serine synthase SbnI                        |
|                                                           | B4602_RS00400 | 3.046          | 3-(L-alanin-3-ylcarbamoyl)-2-[(2-aminoethylcarbamoyl)methyl]-2-hydroxypropanoate synthase SbnF |
|                                                           | B4602_RS00395 | 4.626          | L-2,3-diaminopropanoate--citrate ligase SbnE                                                   |
|                                                           | B4602_RS00385 | 2.880          | Staphyloferrin B biosynthesis protein SbnC                                                     |
|                                                           | B4602_RS00410 | 2.571          | Staphyloferrin B biosynthesis decarboxylase SbnH                                               |
| Ascorbate and aldarate<br>metabolism                      | B4602_RS11165 | 2.531          | Aldehyde dehydrogenase family protein                                                          |
|                                                           | B4602_RS01530 | 8.846          | PTS ascorbate transporter subunit IIC                                                          |
|                                                           | B4602_RS01540 | 7.963          | PTS sugar transporter subunit IIA                                                              |
|                                                           | B4602_RS01535 | 6.872          | PTS sugar transporter subunit IIB                                                              |
|                                                           | B4602_RS11755 | 2.573          | 30S ribosomal protein S8                                                                       |
| Ribosome                                                  | B4602_RS11745 | 2.164          | 50S ribosomal protein L18                                                                      |
|                                                           | B4602_RS11705 | 2.103          | 30S ribosomal protein S13                                                                      |
|                                                           | B4602_RS11765 | 2.497          | 50S ribosomal protein L5                                                                       |
|                                                           | B4602_RS11800 | 2.003          | 50S ribosomal protein L22                                                                      |
|                                                           | B4602_RS11790 | 2.094          | 50S ribosomal protein L16                                                                      |
|                                                           | B4602_RS11770 | 2.500          | 50S ribosomal protein L24                                                                      |
|                                                           | B4602_RS11750 | 2.403          | 50S ribosomal protein L6                                                                       |
|                                                           | B4602_RS11775 | 2.199          | 50S ribosomal protein L14                                                                      |
|                                                           | B4602_RS11760 | 2.791          | Type Z 30S ribosomal protein S14                                                               |
|                                                           | B4602_RS11805 | 2.116          | 30S ribosomal protein S19                                                                      |
|                                                           | B4602_RS11780 | 2.240          | 30S ribosomal protein S17                                                                      |
|                                                           | B4602_RS11735 | 2.008          | 50S ribosomal protein L30                                                                      |
|                                                           | B4602_RS11710 | 2.304          | 50S ribosomal protein L36                                                                      |
|                                                           | B4602_RS11785 | 2.067          | 50S ribosomal protein L29                                                                      |

|                                             |               |       |                                                                |
|---------------------------------------------|---------------|-------|----------------------------------------------------------------|
| C5-Branched dibasic acid metabolism         | B4602_RS11640 | 4.678 | Acetolactate decarboxylase                                     |
|                                             | B4602_RS10785 | 0.379 | 3-isopropylmalate dehydrogenase                                |
|                                             | B4602_RS10790 | 0.414 | 3-isopropylmalate dehydratase large subunit                    |
|                                             | B4602_RS10795 | 0.303 | 3-isopropylmalate dehydratase small subunit                    |
| Alanine, aspartate and glutamate metabolism | B4602_RS04620 | 2.062 | Argininosuccinate lyase                                        |
|                                             | B4602_RS02195 | 2.141 | Glutamate synthase large subunit                               |
|                                             | B4602_RS00095 | 0.413 | Adenylosuccinate synthase                                      |
|                                             | B4602_RS02200 | 2.014 | Glutamate synthase subunit beta                                |
|                                             | B4602_RS05210 | 0.472 | Amidophosphoribosyltransferase                                 |
|                                             | B4602_RS07315 | 2.042 | Alanine dehydrogenase                                          |
| O-Antigen nucleotide sugar biosynthesis     | B4602_RS00445 | 0.214 | NAD-dependent epimerase/dehydratase family protein             |
|                                             | B4602_RS00575 | 4.175 | Type 8 capsular polysaccharide synthesis protein Cap8F         |
|                                             | B4602_RS00570 | 4.080 | Type 8 capsular polysaccharide synthesis protein Cap8E         |
|                                             | B4602_RS00580 | 3.171 | Type 8 capsular polysaccharide synthesis protein Cap8G         |
| Biosynthesis of various antibiotics         | B4602_RS00375 | 8.641 | 2,3-diaminopropionate biosynthesis protein SbnA                |
|                                             | B4602_RS00380 | 3.155 | N-[(2S)-2-amino-2-carboxyethyl]-L-glutamate dehydrogenase SbnB |

**Table S2.** The major altered metabolic pathways in *B. cereus* Y1 treated by Fraction 2 of *A. villosum* Lour.

| Metabolic Pathway    | Gene ID     | Fold Change | Gene Description                            |
|----------------------|-------------|-------------|---------------------------------------------|
| Bacterial chemotaxis | EJ379_25705 | 0.136       | Methyl-accepting chemotaxis protein         |
|                      | EJ379_08390 | 0.110       | Chemotaxis signal transduction protein CheV |
|                      | EJ379_08260 | 0.199       | Chemotaxis protein CheA                     |
|                      | EJ379_23055 | 0.148       | Flagellar motor protein MotB                |
|                      | EJ379_05160 | 0.311       | Response regulator                          |
|                      | EJ379_02860 | 0.101       | HAMP domain-containing protein              |
|                      | EJ379_02170 | 0.188       | Methyl-accepting chemotaxis protein         |
|                      | EJ379_10215 | 0.120       | HAMP domain-containing protein              |
|                      | EJ379_25580 | 0.259       | Methyl-accepting chemotaxis protein         |
|                      | EJ379_23060 | 0.162       | Flagellar motor protein MotA                |
|                      | EJ379_08265 | 0.267       | Flagellar motor switch phosphatase FlhY     |
|                      | EJ379_08255 | 0.261       | Response regulator                          |
|                      | EJ379_02085 | 0.188       | Methyl-accepting chemotaxis protein         |
|                      | EJ379_05155 | 0.312       | Protein-glutamate O-methyltransferase CheR  |
|                      | EJ379_08345 | 0.217       | Flagellar motor switch protein FlhG         |
|                      | EJ379_03465 | 0.358       | Methyl-accepting chemotaxis protein         |
|                      | EJ379_08280 | 0.369       | Protein-glutamate O-methyltransferase CheR  |
|                      | EJ379_08435 | 0.196       | Flagellar motor switch protein FlhM         |

|                            |             |       |                                                                                                     |
|----------------------------|-------------|-------|-----------------------------------------------------------------------------------------------------|
| Nucleotide excision repair | EJ379_25710 | 0.108 | Methyl-accepting chemotaxis protein                                                                 |
|                            | EJ379_08245 | 0.243 | Flagellar motor protein MotP                                                                        |
|                            | EJ379_08250 | 0.463 | Flagellar motor protein MotS                                                                        |
|                            | EJ379_05760 | 0.175 | Methyl-accepting chemotaxis protein                                                                 |
|                            | EJ379_17320 | 0.406 | Methyl-accepting chemotaxis protein                                                                 |
|                            | EJ379_08430 | 0.479 | Flagellar motor switch protein FlhN                                                                 |
|                            | EJ379_00305 | 0.180 | Transcription-repair coupling factor                                                                |
|                            | EJ379_26385 | 0.265 | Excinuclease ABC subunit UvrA                                                                       |
|                            | EJ379_23430 | 0.415 | DNA polymerase I                                                                                    |
|                            | EJ379_23095 | 0.241 | Excinuclease ABC subunit C                                                                          |
| Histidine metabolism       | EJ379_01760 | 0.260 | NAD-dependent DNA ligase LigA                                                                       |
|                            | EJ379_26390 | 0.431 | Excinuclease ABC subunit B                                                                          |
|                            | EJ379_01755 | 0.380 | DNA helicase PcrA                                                                                   |
|                            | EJ379_06255 | 0.410 | ATP-dependent helicase                                                                              |
|                            | EJ379_05330 | 0.330 | Helicase                                                                                            |
|                            | EJ379_14385 | 0.280 | DNA helicase UvrD                                                                                   |
|                            | EJ379_18655 | 0.382 | Formimidoylglutamate                                                                                |
|                            | EJ379_18175 | 0.410 | Aldehyde dehydrogenase DhaS                                                                         |
|                            | EJ379_18660 | 0.409 | Imidazolonepropionase                                                                               |
|                            | EJ379_18665 | 0.353 | Urocanate hydratase                                                                                 |
| Mismatch repair            | EJ379_18670 | 0.486 | Histidine ammonia-lyase                                                                             |
|                            | EJ379_07680 | 0.491 | Histidinol-phosphate transaminase                                                                   |
|                            | EJ379_07135 | 0.265 | Histidinol dehydrogenase                                                                            |
|                            | EJ379_06560 | 0.398 | Aldehyde dehydrogenase                                                                              |
|                            | EJ379_07125 | 0.307 | ATP phosphoribosyltransferase regulatory subunit                                                    |
|                            | EJ379_07170 | 0.220 | Histidinol phosphate phosphatase domain-containing protein                                          |
|                            | EJ379_07150 | 0.056 | 1-(5-phosphoribosyl)-5-((5-phosphoribosylamino)methylideneamino)imidazole 2-4-carboxamide isomerase |
|                            | EJ379_07130 | 0.185 | ATP phosphoribosyltransferase                                                                       |
|                            | EJ379_07145 | 0.089 | Imidazole glycerol phosphate synthase subunit HisH                                                  |
|                            | EJ379_07140 | 0.263 | Imidazoleglycerol-phosphate dehydratase HisB                                                        |
|                            | EJ379_15060 | 2.156 | Histidinol-phosphate transaminase                                                                   |
|                            | EJ379_07160 | 0.036 | Phosphoribosyl-AMP cyclohydrolase                                                                   |
|                            | EJ379_07155 | 0.068 | Imidazoleglycerol phosphate synthase cyclase subunit                                                |
|                            | EJ379_27960 | 0.382 | Single-stranded DNA-binding protein                                                                 |
|                            | EJ379_23520 | 0.263 | DNA polymerase III subunit alpha                                                                    |
|                            | EJ379_19260 | 0.332 | DNA mismatch repair endonuclease MutL                                                               |
|                            | EJ379_19265 | 0.421 | DNA mismatch repair protein MutS                                                                    |
|                            | EJ379_00130 | 0.480 | DNA polymerase III subunit gamma/tau                                                                |

|                                                         |             |       |                                                         |
|---------------------------------------------------------|-------------|-------|---------------------------------------------------------|
|                                                         | EJ379_21375 | 0.332 | Exodeoxyribonuclease VII large subunit                  |
|                                                         | EJ379_00010 | 0.242 | DNA polymerase III subunit beta                         |
|                                                         | EJ379_19505 | 0.451 | PolC-type DNA polymerase III                            |
|                                                         | EJ379_23250 | 0.391 | Endonuclease MutS2                                      |
|                                                         | EJ379_18460 | 0.462 | 3'-5' exonuclease                                       |
|                                                         | EJ379_13795 | 0.388 | DNA polymerase III subunit beta                         |
|                                                         | EJ379_21370 | 0.267 | Exodeoxyribonuclease VII small subunit                  |
|                                                         | EJ379_17790 | 0.500 | Endonuclease MutS2                                      |
| Valine, leucine and isoleucine degradation              | EJ379_21270 | 0.198 | 3-methyl-2-oxobutanoate dehydrogenase subunit beta      |
|                                                         | EJ379_21275 | 0.188 | 3-methyl-2-oxobutanoate dehydrogenase subunit alpha     |
|                                                         | EJ379_21280 | 0.180 | Dihydrolipoyl dehydrogenase                             |
|                                                         | EJ379_21290 | 0.286 | Leucine dehydrogenase                                   |
|                                                         | EJ379_20560 | 0.413 | Acetyl-CoA C-acetyltransferase                          |
|                                                         | EJ379_21265 | 0.179 | 2-oxo acid dehydrogenase subunit E2                     |
|                                                         | EJ379_20285 | 0.315 | Dihydrolipoyl dehydrogenase                             |
|                                                         | EJ379_11710 | 0.490 | CoA-acylating methylmalonate-semialdehyde dehydrogenase |
|                                                         | EJ379_12715 | 0.434 | Hydroxymethylglutaryl-CoA lyase                         |
|                                                         | EJ379_27290 | 0.409 | Acyl-CoA dehydrogenase AcdA                             |
|                                                         | EJ379_07085 | 0.319 | Branched-chain-amino-acid transaminase                  |
|                                                         | EJ379_20660 | 0.484 | NAD(P)-dependent oxidoreductase                         |
|                                                         | EJ379_01835 | 4.544 | 4-aminobutyrate-2-oxoglutarate transaminase             |
|                                                         | EJ379_18540 | 4.023 | Acetyl-CoA C-acyltransferase                            |
| O-Antigen nucleotide sugar biosynthesis                 | EJ379_27830 | 2.904 | UDP-glucose 4-epimerase GalE                            |
|                                                         | EJ379_02515 | 0.118 | SDR family NAD(P)-dependent oxidoreductase              |
|                                                         | EJ379_26945 | 0.073 | UTP-glucose-1-phosphate uridylyltransferase GalU        |
|                                                         | EJ379_01610 | 0.118 | NAD-dependent epimerase/dehydratase family protein      |
| Biosynthesis of siderophore group nonribosomal peptides | EJ379_11790 | 0.338 | Non-ribosomal peptide synthetase                        |
|                                                         | EJ379_11780 | 0.247 | (2,3-dihydroxybenzoyl)adenylate synthase                |
|                                                         | EJ379_10065 | 0.293 | IucA/IucC family siderophore biosynthesis protein       |
|                                                         | EJ379_11775 | 0.228 | Isochorismate synthase Dhbc                             |
|                                                         | EJ379_10070 | 0.274 | Siderophore biosynthesis protein                        |
|                                                         | EJ379_11785 | 0.327 | Isochorismatase family protein                          |
|                                                         | EJ379_10075 | 0.349 | Acyl-CoA synthetase                                     |
|                                                         | EJ379_10085 | 0.270 | Petrobactin biosynthesis protein AsbE                   |
|                                                         | EJ379_10090 | 0.079 | Sugar phosphate isomerase/epimerase                     |

**Table S3.** The major altered metabolic pathways in *V. parahaemolyticus* B2-28 treated by Fraction 2 of *A. villosum* Lour.

| Metabolic Pathway                       | Gene ID       | Fold Change | Gene Description                                 |
|-----------------------------------------|---------------|-------------|--------------------------------------------------|
| Glyoxylate and dicarboxylate metabolism | Vp_B2_28_3885 | 4.678       | Hypothetical protein                             |
|                                         | Vp_B2_28_3268 | 0.288       | Membrane protein                                 |
|                                         | Vp_B2_28_4325 | 0.214       | Transcriptional regulator                        |
|                                         | Vp_B2_28_4324 | 0.253       | Glycine cleavage system aminomethyltransferase T |
|                                         | Vp_B2_28_4323 | 0.350       | Glycine cleavage system aminomethyltransferase T |
|                                         | Vp_B2_28_2435 | 0.466       | tRNA guanosine(34) transglycosylase Tgt          |
|                                         | Vp_B2_28_2434 | 0.499       | Preprotein translocase subunit YajC              |
|                                         | Vp_B2_28_1968 | 0.184       | Preprotein translocase subunit SecD              |
|                                         | Vp_B2_28_4316 | 0.126       | Multidrug transporter AcrB                       |
|                                         | Vp_B2_28_0438 | 2.081       | Catalase                                         |
| Propanoate metabolism                   | Vp_B2_28_2170 | 0.271       | Trypsin                                          |
|                                         | Vp_B2_28_2168 | 0.432       | DNA mismatch repair protein MutT                 |
|                                         | Vp_B2_28_5268 | 4.475       | FMN-dependent NADH-azoreductase                  |
|                                         | Vp_B2_28_5269 | 7.930       | RNA helicase                                     |
|                                         | Vp_B2_28_2171 | 0.325       | Histone acetyltransferase                        |
|                                         | Vp_B2_28_5619 | 0.264       | Phosphoenolpyruvate-protein phosphotransferase   |
|                                         | Vp_B2_28_2169 | 0.199       | DNA mismatch repair protein MutT                 |
|                                         | Vp_B2_28_2172 | 0.369       | Histone acetyltransferase                        |
|                                         | Vp_B2_28_2173 | 0.297       | Propionyl-CoA synthetase                         |
|                                         | Vp_B2_28_5544 | 0.350       | Hypothetical protein                             |
| Lysine degradation                      | Vp_B2_28_5206 | 0.279       | Formate dehydrogenase accessory protein FdhD     |
|                                         | Vp_B2_28_3274 | 0.453       | Citrate (Si)-synthase                            |
|                                         | Vp_B2_28_3823 | 2.086       | Heavy metal-responsive transcriptional regulator |
|                                         | Vp_B2_28_1176 | 0.482       | Hypothetical protein                             |
|                                         | Vp_B2_28_3822 | 2.616       | Hypothetical protein                             |
|                                         | Vp_B2_28_2037 | 0.216       | Agmatine deiminase                               |
|                                         | Vp_B2_28_2035 | 0.216       | N-carbamoylputrescine amidase                    |
|                                         | Vp_B2_28_2034 | 0.177       | Gamma-glutamylputrescine oxidoreductase          |
|                                         | Vp_B2_28_2033 | 0.145       | Gamma-glutamylputrescine oxidoreductase          |
|                                         | Vp_B2_28_1175 | 3.719       | Cystatin domain protein                          |
| Fatty acid degradation                  | Vp_B2_28_4879 | 0.256       | NAD(P)-dependent oxidoreductase                  |
|                                         | Vp_B2_28_2279 | 0.180       | Chemotaxis protein                               |
|                                         | Vp_B2_28_0250 | 0.344       | 3-ketoacyl-CoA thiolase                          |
|                                         | Vp_B2_28_0998 | 0.303       | Acyl-CoA dehydrogenase                           |
|                                         | Vp_B2_28_0996 | 0.326       | Acyl-CoA dehydrogenase                           |
|                                         | Vp_B2_28_0966 | 0.451       | Long-chain-fatty-acid-CoA ligase                 |
|                                         | Vp_B2_28_0997 | 0.174       | Acyl-CoA dehydrogenase                           |
| Carbon fixation pathways in prokaryotes | Vp_B2_28_3275 | 0.374       | Succinate dehydrogenase, cytochrome b556 subunit |
|                                         | Vp_B2_28_0565 | 0.383       | Aconitate hydratase B                            |

|                           |                      |       |                                                                   |
|---------------------------|----------------------|-------|-------------------------------------------------------------------|
| One carbon pool by folate | <i>Vp_B2_28_5208</i> | 0.041 | Hexose phosphate transporter                                      |
|                           | <i>Vp_B2_28_3538</i> | 0.491 | LysR family transcriptional regulator                             |
|                           | <i>Vp_B2_28_0656</i> | 0.453 | Mannitol repressor family protein                                 |
|                           | <i>Vp_B2_28_2724</i> | 0.310 | Dnd system-associated protein 3                                   |
|                           | <i>Vp_B2_28_3815</i> | 0.245 | Hypothetical protein                                              |
|                           | <i>Vp_B2_28_4318</i> | 0.097 | Multidrug transporter AcrB                                        |
|                           | <i>Vp_B2_28_4317</i> | 0.149 | Multidrug transporter AcrB                                        |
|                           | <i>Vp_B2_28_2725</i> | 0.406 | Hypothetical protein                                              |
|                           | <i>Vp_B2_28_3454</i> | 0.479 | Fatty acid hydroxylase superfamily protein                        |
|                           | <i>Vp_B2_28_2764</i> | 2.500 | Met repressor                                                     |
| Methane metabolism        | <i>Vp_B2_28_4138</i> | 0.080 | Ligase                                                            |
|                           | <i>Vp_B2_28_1542</i> | 0.369 | Universal stress protein                                          |
|                           | <i>Vp_B2_28_4321</i> | 0.257 | TetR family transcriptional regulator                             |
|                           | <i>Vp_B2_28_4320</i> | 0.099 | Hypothetical protein                                              |
|                           | <i>Vp_B2_28_3883</i> | 4.586 | Formate dehydrogenase                                             |
|                           | <i>Vp_B2_28_5173</i> | 2.388 | Nitrate transporter system, permease component                    |
|                           | <i>Vp_B2_28_0682</i> | 2.134 | Formate dehydrogenase                                             |
|                           | <i>Vp_B2_28_5174</i> | 2.659 | Nitrate ABC transporter ATP-binding protein                       |
|                           | <i>Vp_B2_28_2596</i> | 2.270 | Hypothetical protein                                              |
|                           | <i>Vp_B2_28_3884</i> | 4.607 | Hypothetical protein                                              |
|                           | <i>Vp_B2_28_0681</i> | 2.262 | Formate dehydrogenase                                             |
|                           | <i>Vp_B2_28_0680</i> | 2.430 | Formate dehydrogenase                                             |
|                           | <i>Vp_B2_28_0679</i> | 3.703 | Formate dehydrogenase subunit alpha                               |
|                           | <i>Vp_B2_28_2813</i> | 0.088 | Iron-hydroxamate ABC transporter substrate-binding protein        |
|                           |                      |       |                                                                   |
| Sulfur metabolism         | <i>Vp_B2_28_2811</i> | 0.092 | tRNA dihydrouridine synthase DusA                                 |
|                           | <i>Vp_B2_28_2812</i> | 0.098 | Phage shock protein G                                             |
|                           | <i>Vp_B2_28_2814</i> | 0.110 | Hypothetical protein                                              |
|                           | <i>Vp_B2_28_4010</i> | 0.196 | Hypothetical protein                                              |
|                           | <i>Vp_B2_28_4114</i> | 4.401 | Exonuclease                                                       |
|                           | <i>Vp_B2_28_5645</i> | 4.972 | Dimethylsulfoxide reductase subunit B                             |
|                           | <i>Vp_B2_28_2815</i> | 0.080 | Sulfite reductase                                                 |
|                           | <i>Vp_B2_28_4113</i> | 3.789 | Sensor domain-containing diguanylate cyclase                      |
|                           | <i>Vp_B2_28_5675</i> | 3.883 | 3-hydroxyisobutyrate dehydrogenase                                |
|                           | <i>Vp_B2_28_2059</i> | 3.905 | Chemotaxis protein CheY                                           |
|                           | <i>Vp_B2_28_4870</i> | 2.491 | Prevent-host-death family protein                                 |
|                           | <i>Vp_B2_28_3206</i> | 2.021 | Amino acid acetyltransferase                                      |
| ABC transporters          | <i>Vp_B2_28_0738</i> | 0.159 | Amino acid ABC transporter periplasmic amino acid-binding protein |
|                           | <i>Vp_B2_28_0132</i> | 0.215 | Oligopeptide ABC transporter ATP-binding protein OppF             |
|                           | <i>Vp_B2_28_0133</i> | 0.236 | Oligopeptide ABC transporter ATP-binding protein OppD             |
|                           | <i>Vp_B2_28_0134</i> | 0.176 | Peptide ABC transporter permease                                  |

|               |        |                                                                                  |
|---------------|--------|----------------------------------------------------------------------------------|
| Vp_B2_28_0135 | 0.178  | Peptide ABC transporter permease                                                 |
| Vp_B2_28_0136 | 0.306  | Peptide ABC transporter substrate-binding protein                                |
| Vp_B2_28_0735 | 0.221  | Serine protease                                                                  |
| Vp_B2_28_0737 | 0.201  | Amino acid transporter                                                           |
| Vp_B2_28_3870 | 5.298  | Hypothetical protein                                                             |
| Vp_B2_28_5552 | 0.022  | Choline ABC transporter substrate-binding protein                                |
| Vp_B2_28_5551 | 0.020  | Methylmalonate-semialdehyde dehydrogenase (acylating)                            |
| Vp_B2_28_3093 | 0.052  | DNA polymerase III subunit epsilon                                               |
| Vp_B2_28_3096 | 0.062  | Cyclic nucleotide-binding protein                                                |
| Vp_B2_28_1128 | 27.425 | RND transporter                                                                  |
| Vp_B2_28_3097 | 0.057  | Cyclic nucleotide-binding protein                                                |
| Vp_B2_28_0062 | 0.364  | ABC transporter substrate-binding protein                                        |
| Vp_B2_28_3094 | 0.079  | Cyclic nucleotide-binding protein                                                |
| Vp_B2_28_0739 | 0.195  | ABC transporter                                                                  |
| Vp_B2_28_5553 | 0.014  | Hypothetical protein                                                             |
| Vp_B2_28_4436 | 2.295  | LysR family transcriptional regulator                                            |
| Vp_B2_28_3393 | 0.225  | Hypothetical protein                                                             |
| Vp_B2_28_3391 | 0.383  | Orotate phosphoribosyltransferase                                                |
| Vp_B2_28_3392 | 0.265  | Ribonuclease PH                                                                  |
| Vp_B2_28_3868 | 2.087  | Flagellar synthesis chaperone protein                                            |
| Vp_B2_28_3732 | 0.387  | Thiol:disulfide interchange protein DsbE                                         |
| Vp_B2_28_0736 | 0.193  | Histidine/lysine/arginine/ornithine ABC transporter ATP<br>-binding protein HisP |
| Vp_B2_28_4437 | 2.073  | Cytochrome biogenesis protein                                                    |
| Vp_B2_28_2754 | 0.345  | Iron transporter FeoA                                                            |
| Vp_B2_28_3730 | 0.483  | C-type cytochrome biogenesis protein CcmI                                        |
| Vp_B2_28_4300 | 0.343  | ABC transporter permease                                                         |
| Vp_B2_28_4094 | 0.172  | Hypothetical protein                                                             |
| Vp_B2_28_4301 | 0.299  | Hypothetical protein                                                             |
| Vp_B2_28_3869 | 2.966  | N-acetylglucosamine kinase                                                       |
| Vp_B2_28_4439 | 2.332  | Universal stress protein UspA                                                    |
| Vp_B2_28_4386 | 2.479  | LysR family transcriptional regulator                                            |
| Vp_B2_28_3731 | 0.370  | Cystathionine gamma-synthase                                                     |
| Vp_B2_28_4093 | 0.263  | Alcohol dehydrogenase                                                            |
| Vp_B2_28_4499 | 2.963  | FAD-linked oxidase                                                               |
| Vp_B2_28_4303 | 0.181  | Collagenase                                                                      |
| Vp_B2_28_4498 | 2.356  | Arginine ABC transporter substrate-binding protein                               |
| Vp_B2_28_4385 | 2.495  | Methyltransferase                                                                |
| Vp_B2_28_3639 | 0.219  | Electron transporter RnfB                                                        |
| Vp_B2_28_2755 | 0.296  | Hypothetical protein                                                             |
| Vp_B2_28_2575 | 4.648  | Hypothetical protein                                                             |
| Vp_B2_28_4594 | 0.162  | Thiaminase II                                                                    |

|                                 |               |        |                                                              |
|---------------------------------|---------------|--------|--------------------------------------------------------------|
| Quorum sensing                  | Vp_B2_28_4169 | 0.430  | Hypothetical protein                                         |
|                                 | Vp_B2_28_5464 | 0.196  | HNH endonuclease                                             |
|                                 | Vp_B2_28_5432 | 0.435  | GGDEF domain-containing protein                              |
|                                 | Vp_B2_28_2324 | 0.366  | Arylsulfatase                                                |
|                                 | Vp_B2_28_0378 | 0.294  | Phosphate ABC transporter, permease protein PstA             |
|                                 | Vp_B2_28_5366 | 0.103  | TetR family transcriptional regulator                        |
|                                 | Vp_B2_28_5602 | 0.066  | Phosphoribosylglycinamide formyltransferase                  |
|                                 | Vp_B2_28_2576 | 0.380  | PreQ(1) synthase                                             |
|                                 | Vp_B2_28_3965 | 0.426  | Hypothetical protein                                         |
|                                 | Vp_B2_28_4833 | 0.465  | Glyoxalase                                                   |
|                                 | Vp_B2_28_1994 | 0.149  | Membrane protein                                             |
|                                 | Vp_B2_28_0547 | 0.116  | Peptide ABC transporter substrate-binding protein            |
|                                 | Vp_B2_28_4613 | 0.429  | Peptide ABC transporter, periplasmic peptide-binding protein |
|                                 | Vp_B2_28_0587 | 0.282  | LuxR family transcriptional regulator                        |
|                                 | Vp_B2_28_4612 | 0.448  | ABC transporter ATP-binding protein                          |
|                                 | Vp_B2_28_4614 | 0.315  | Transcriptional regulator IlvY                               |
|                                 | Vp_B2_28_4615 | 0.434  | Ketol-acid reductoisomerase                                  |
|                                 | Vp_B2_28_1993 | 0.154  | Carotenoid dehydrogenase                                     |
|                                 | Vp_B2_28_0549 | 0.140  | Peptide ABC transporter permease                             |
|                                 | Vp_B2_28_3425 | 2.705  | LPS biosynthesis protein                                     |
|                                 | Vp_B2_28_1951 | 0.495  | Conserved hypothetical protein                               |
|                                 | Vp_B2_28_0548 | 0.191  | Peptide ABC transporter permease                             |
|                                 | Vp_B2_28_0965 | 0.411  | Transcriptional regulator                                    |
|                                 | Vp_B2_28_0551 | 0.215  | Peptide ABC transporter ATP-binding protein                  |
|                                 | Vp_B2_28_0550 | 0.166  | Peptide ABC transporter ATP-binding protein                  |
|                                 | Vp_B2_28_3389 | 0.474  | Nucleoid occlusion factor SlmA                               |
|                                 | Vp_B2_28_2766 | 3.787  | Bifunctional aspartate kinase/homoserine dehydrogenase II    |
|                                 | Vp_B2_28_4289 | 0.257  | Transcription regulator                                      |
|                                 | Vp_B2_28_3640 | 0.241  | Electron transporter RnfB                                    |
|                                 | Vp_B2_28_4302 | 0.141  | Collagenase                                                  |
|                                 | Vp_B2_28_5462 | 0.331  | OtnA protein                                                 |
|                                 | Vp_B2_28_4292 | 0.310  | Amino acid dehydrogenase                                     |
| Arginine and proline metabolism | Vp_B2_28_3777 | 0.234  | Histidine kinase                                             |
|                                 | Vp_B2_28_2907 | 70.055 | Endonuclease I                                               |
|                                 | Vp_B2_28_4180 | 0.283  | PTS glucose transporter subunit IIBC                         |
|                                 | Vp_B2_28_4181 | 0.284  | Nuclease                                                     |
|                                 | Vp_B2_28_2021 | 0.077  | Lactoylglutathione lyase                                     |
|                                 | Vp_B2_28_2026 | 0.091  | Glutamine synthetase                                         |
|                                 | Vp_B2_28_2027 | 0.137  | Hypothetical protein                                         |
|                                 | Vp_B2_28_2032 | 0.143  | Gamma-glutamylputrescine oxidoreductase                      |



|                                    |               |       |                                                           |
|------------------------------------|---------------|-------|-----------------------------------------------------------|
|                                    | Vp_B2_28_2030 | 0.123 | Aldehyde dehydrogenase                                    |
|                                    | Vp_B2_28_2025 | 0.144 | Na <sup>+</sup> /H <sup>+</sup> antiporter family protein |
|                                    | Vp_B2_28_2028 | 0.090 | Glutamine amidotransferase                                |
|                                    | Vp_B2_28_4290 | 0.198 | Aldehyde dehydrogenase                                    |
|                                    | Vp_B2_28_2031 | 0.169 | Aldehyde dehydrogenase                                    |
|                                    | Vp_B2_28_0934 | 0.071 | Carboxynorspermidine decarboxylase                        |
| Taurine and hypotaurine metabolism | Vp_B2_28_2494 | 0.353 | RNA chaperone ProQ                                        |
|                                    | Vp_B2_28_0127 | 2.320 | Phosphate acetyltransferase                               |
|                                    | Vp_B2_28_0126 | 2.413 | Acetate kinase                                            |
|                                    | Vp_B2_28_2331 | 3.087 | Hypothetical protein                                      |
|                                    | Vp_B2_28_2493 | 0.488 | Hypothetical protein                                      |
|                                    | Vp_B2_28_2495 | 0.420 | Tail-specific protease                                    |
|                                    | Vp_B2_28_4228 | 0.471 | Hypothetical protein                                      |
| Purine metabolism                  | Vp_B2_28_4988 | 0.327 | Membrane protein                                          |
|                                    | Vp_B2_28_1503 | 0.048 | ATP-dependent RNA helicase                                |
|                                    | Vp_B2_28_1504 | 0.052 | Crp/Fnr family transcriptional regulator                  |
|                                    | Vp_B2_28_3533 | 3.272 | Hypothetical protein                                      |
|                                    | Vp_B2_28_1508 | 0.054 | Sulfate adenylyltransferase subunit 2                     |
|                                    | Vp_B2_28_3814 | 0.351 | S-adenosyl-L-homocysteine hydrolase NAD-binding protein   |
|                                    | Vp_B2_28_0927 | 0.486 | Ribonucleotide-diphosphate reductase subunit alpha        |
|                                    | Vp_B2_28_1725 | 0.350 | Molecular chaperone DnaJ                                  |
|                                    | Vp_B2_28_2334 | 0.449 | RNA helicase                                              |
|                                    | Vp_B2_28_0222 | 0.446 | Amidophosphoribosyltransferase                            |
|                                    | Vp_B2_28_2527 | 0.375 | Hypothetical protein                                      |
|                                    | Vp_B2_28_2526 | 0.392 | Prepilin-type cleavage/methylation protein                |
|                                    | Vp_B2_28_0493 | 2.476 | Purine-nucleoside phosphorylase                           |
|                                    | Vp_B2_28_3625 | 0.456 | Conserved hypothetical protein                            |
|                                    | Vp_B2_28_0929 | 0.367 | Ribonucleotide-diphosphate reductase subunit beta         |
|                                    | Vp_B2_28_2411 | 0.478 | Membrane protein                                          |
|                                    | Vp_B2_28_1500 | 2.027 | Peptidoglycan-binding protein LysM                        |
|                                    | Vp_B2_28_1354 | 3.089 | Permease                                                  |
|                                    | Vp_B2_28_5596 | 0.395 | Hypothetical protein                                      |
|                                    | Vp_B2_28_3305 | 2.235 | tRNA pseudouridine synthase TruD                          |
|                                    | Vp_B2_28_5595 | 0.450 | Flagellar sheath protein A                                |
|                                    | Vp_B2_28_2529 | 0.310 | Conserved hypothetical protein                            |
|                                    | Vp_B2_28_4080 | 0.496 | Patatin family protein                                    |
|                                    | Vp_B2_28_2528 | 0.430 | Aminobenzoyl-glutamate transporter                        |
|                                    | Vp_B2_28_1552 | 0.495 | 50S ribosomal protein L27                                 |
|                                    | Vp_B2_28_4987 | 0.399 | Hypothetical protein                                      |
|                                    | Vp_B2_28_4549 | 0.465 | Chaperone protein ClpB                                    |

|                                   |                      |       |                                                            |
|-----------------------------------|----------------------|-------|------------------------------------------------------------|
| alpha-Linolenic acid metabolism   | <i>Vp_B2_28_5043</i> | 0.286 | Hypothetical protein                                       |
|                                   | <i>Vp_B2_28_5133</i> | 0.379 | Haloacid dehalogenase                                      |
|                                   | <i>Vp_B2_28_1729</i> | 0.494 | DNA helicase                                               |
| Non-alcoholic fatty liver disease | <i>Vp_B2_28_1595</i> | 0.279 | Penicillin-binding protein activator                       |
|                                   | <i>Vp_B2_28_1596</i> | 0.254 | Conserved hypothetical protein                             |
|                                   | <i>Vp_B2_28_1597</i> | 0.238 | DnaA initiator-associating protein DiaA                    |
| Butanoate metabolism              | <i>Vp_B2_28_5427</i> | 2.825 | Hypothetical protein                                       |
|                                   | <i>Vp_B2_28_3272</i> | 0.464 | Type II citrate synthase                                   |
|                                   | <i>Vp_B2_28_3271</i> | 0.420 | Phosphoglucomutase, alpha-D-glucose phosphate-specific     |
|                                   | <i>Vp_B2_28_5121</i> | 3.969 | PrkA family serine protein kinase                          |
|                                   | <i>Vp_B2_28_5042</i> | 0.398 | Redox-sensitive transcriptional activator SoxR             |
|                                   | <i>Vp_B2_28_0249</i> | 0.386 | Multifunctional fatty acid oxidation complex subunit alpha |
|                                   | <i>Vp_B2_28_3270</i> | 0.391 | SeqA protein                                               |
|                                   | <i>Vp_B2_28_1970</i> | 0.189 | Hypothetical protein                                       |
|                                   | <i>Vp_B2_28_1967</i> | 0.148 | Hypothetical protein                                       |
|                                   | <i>Vp_B2_28_2291</i> | 0.271 | Hypothetical protein                                       |
|                                   | <i>Vp_B2_28_2290</i> | 0.413 | Hypothetical protein                                       |
|                                   | <i>Vp_B2_28_3628</i> | 0.299 | Transcriptional regulator                                  |
|                                   | <i>Vp_B2_28_3627</i> | 0.344 | Oxidoreductase                                             |

**Table S4.** Comparison of the major altered metabolic pathways in the three target strains treated by Fraction 2 of *A. villosum* Lour.

| Metabolic Pathway                                       | Gram-positive strain      |                     | Gram-negative strain            |
|---------------------------------------------------------|---------------------------|---------------------|---------------------------------|
|                                                         | <i>S. aureus</i> GIM1.441 | <i>B. cereus</i> Y1 | <i>V. parahemolyticus</i> B2-28 |
| Valine, leucine and isoleucine biosynthesis             | +                         | -                   | -                               |
| Biosynthesis of various other secondary metabolites     | +                         | -                   | -                               |
| Ascorbate and aldarate metabolism                       | +                         | -                   | -                               |
| Ribosome                                                | +                         | -                   | -                               |
| C5-Branched dibasic acid metabolism                     | +                         | -                   | -                               |
| Alanine, aspartate and glutamate metabolism             | +                         | -                   | -                               |
| O-Antigen nucleotide sugar biosynthesis                 | +                         | +                   | -                               |
| Biosynthesis of various antibiotics                     | +                         | -                   | -                               |
| Bacterial chemotaxis                                    | -                         | +                   | -                               |
| Nucleotide excision repair                              | -                         | +                   | -                               |
| Histidine metabolism                                    | -                         | +                   | -                               |
| Mismatch repair                                         | -                         | +                   | -                               |
| Valine, leucine and isoleucine degradation              | -                         | +                   | -                               |
| Biosynthesis of siderophore group nonribosomal peptides | -                         | +                   | -                               |
| Glyoxylate and dicarboxylate metabolism                 | -                         | -                   | +                               |
| Propanoate metabolism                                   | -                         | -                   | +                               |

|                                         |   |   |   |
|-----------------------------------------|---|---|---|
| Lysine degradation                      | - | - | + |
| Fatty acid degradation                  | - | - | + |
| Carbon fixation pathways in prokaryotes | - | - | + |
| One carbon pool by folate               | - | - | + |
| Methane metabolism                      | - | - | + |
| Sulfur metabolism                       | - | - | + |
| ABC transporters                        | - | - | + |
| Quorum sensing                          | - | - | + |
| Arginine and proline metabolism         | - | - | + |
| Taurine and hypotaurine metabolism      | - | - | + |
| Purine metabolism                       | - | - | + |
| alpha-Linolenic acid metabolism         | - | - | + |
| Non-alcoholic fatty liver disease       | - | - | + |
| Butanoate metabolism                    | - | - | + |
| Central carbon metabolism in cancer     | - | - | + |

Note: +: altered. -: not altered.

**Table S5.** The oligonucleotide primers designed and used in the RT-qPCR assay.

| Bacterial Strain                 | Primer          | Sequence (5' to 3')   |
|----------------------------------|-----------------|-----------------------|
| <i>S. aureus</i> GIM1.441        | B4602_RS10775-F | AAATACCGCAAGAACCCAA   |
|                                  | B4602_RS10775-R | GCGATACGCTGAACACTCG   |
|                                  | B4602_RS01530-F | TACCGCAAGAACCCAAGA    |
|                                  | B4602_RS01530-R | CGATACGCTGAACACTCG    |
|                                  | B4602_RS02195-F | GTGTTGAACGAGCGACCAG   |
|                                  | B4602_RS02195-R | AACGCATCTTCCAAATCCC   |
|                                  | B4602_RS00385-F | CAATTACGATAGAGGGAAGG  |
|                                  | B4602_RS00385-R | TACACTTGATAATCCGCTTC  |
|                                  | B4602_RS00410-F | TTTTGGTGGCCCTGGTAAG   |
|                                  | B4602_RS00410-R | TTGGGAAATGGTCCTGCTA   |
| <i>B. cereus</i> Y1              | EJ379_25705-F   | GCAAGAACCCAAGAAACTAT  |
|                                  | EJ379_25705-R   | CAATGACTTTATTCCCATCA  |
|                                  | EJ379_05155-F   | CTGAGATGTTCCGTAACCCTG |
|                                  | EJ379_05155-R   | GTTGCGTAAATAACCGACTT  |
|                                  | EJ379_01760-F   | GCAGCAGCAGGTTCAATA    |
|                                  | EJ379_01760-R   | GAAGGGCAACATCATCTA    |
|                                  | EJ379_19260-F   | CGCCCTGCTTCAGTCGTA    |
|                                  | EJ379_19260-R   | ACTCGGCAATGCCTCACC    |
|                                  | EJ379_27830-F   | CGGAAATGACTATCCAACGA  |
|                                  | EJ379_27830-R   | ACCTGGGCGACGCTCTGTAA  |
| <i>V. parahaemolyticus</i> B2-28 | Vp_B2_28_4316-F | AGGTGGTTTCCCAGGTGC    |
|                                  | Vp_B2_28_4316-R | CCCATTGATACTGGCTTACC  |
|                                  | Vp_B2_28_2625-F | CAAGTGGAAGTGC GTGAA   |
|                                  | Vp_B2_28_2625-R | GTGCCTGGAAGACCGATA    |
|                                  | Vp_B2_28_2812-F | CACCTTACCGTTGGATTG    |
|                                  | Vp_B2_28_2812-R | CTGGCAGTTTGAAGTTATTG  |
|                                  | Vp_B2_28_0737-F | TGTTGCTCAAGCGAAAGAA   |

|                 |                       |
|-----------------|-----------------------|
| Vp_B2_28_0737-R | GAATAATGCCATCCCAATC   |
| Vp_B2_28_0737-F | GTTATCTCCATCATTGGCTCT |
| Vp_B2_28_0737-R | CGAACGAATACGCTGAAC    |

**Table S6.** The relative expression of the representative DEGs by the RT-qPCR assay.

| Bacterial Strain                 | Gene          | Predicted Protein                                | Fold Change |         |
|----------------------------------|---------------|--------------------------------------------------|-------------|---------|
|                                  |               |                                                  | RNA-Seq.    | RT-qPCR |
| <i>S. aureus</i> GIM1.441        | B4602_RS10775 | Ketol-acid reductoisomerase                      | 0.447       | 0.236   |
|                                  | B4602_RS01530 | PTS ascorbate transporter subunit IIC            | 8.846       | 1.532   |
|                                  | B4602_RS02195 | Glutamate synthase large subunit                 | 2.141       | 1.901   |
|                                  | B4602_RS00385 | Staphyloferrin B biosynthesis protein SbnC       | 2.88        | 5.375   |
|                                  | B4602_RS00410 | Staphyloferrin B biosynthesis decarboxylase SbnH | 2.571       | 3.309   |
| <i>B. cereus</i> Y1              | EJ379_25705   | Methyl-accepting chemotaxis protein              | 0.136       | 0.097   |
|                                  | EJ379_05155   | Protein-glutamate O-methyltransferase CheR       | 0.312       | 0.377   |
|                                  | EJ379_01760   | NAD-dependent DNA ligase LigA                    | 0.26        | 0.075   |
|                                  | EJ379_19260   | DNA mismatch repair endonuclease MutL            | 0.332       | 0.694   |
|                                  | EJ379_27830   | UDP-glucose 4-epimerase GalE                     | 2.904       | 3.320   |
| <i>V. parahaemolyticus</i> B2-28 | Vp_B2_28_4316 | Multidrug transporter AcrB                       | 0.126       | 0.041   |
|                                  | Vp_B2_28_2625 | RpoS                                             | 2.64        | 7.21    |
|                                  | Vp_B2_28_2812 | Phage shock protein G                            | 0.098       | 0.549   |
|                                  | Vp_B2_28_0737 | Amino acid transporter                           | 0.201       | 0.033   |
|                                  | Vp_B2_28_0735 | Serine protease                                  | 0.221       | 0.652   |

**Table S7.** The bacterial strains and media used in this study.

| Bacterial Strain                         | Culture Medium | Source              |
|------------------------------------------|----------------|---------------------|
| <i>Aeromonas hydrophila</i> ATCC35654    | TSB            | ATCC, United States |
| <i>Bacillus cereus</i> Y1                | TSB            | LS-SHOU, China      |
| <i>Enterobacter cloacae</i> ATCC13047    | TSB            | Biobw, China        |
| <i>Enterobacter cloacae</i> D1           | TSB            | Biobw, China        |
| <i>Escherichia coli</i> ATCC8739         | TSB            | Biobw, China        |
| <i>Escherichia coli</i> K12              | TSB            | IIM, China          |
| <i>Escherichia coli</i> ATCC25922        | TSB            | IIM, China          |
| <i>Enterobacter sakazakii</i> CMCC45401  | TSB            | Biobw, China        |
| <i>Klebsiella pneumoniae</i> 7-17-16     | EE             | LS-SHOU, China      |
| <i>Pseudomonas aeruginosa</i> ATCC9027   | TSB            | Biobw, China        |
| <i>Pseudomonas aeruginosa</i> ATCC27853  | TSB            | Biobw, China        |
| <i>Staphylococcus aureus</i> GIM1.481    | TSB            | ATCC, United States |
| <i>Staphylococcus aureus</i> GIM1.441    | TSB            | ATCC, United States |
| <i>Staphylococcus aureus</i> GIM1.160    | TSB            | ATCC, United States |
| <i>Shigella dysenteriae</i> CMCC51252    | TSB            | GCCC, China         |
| <i>Salmonella choleraesuis</i> ATCC13312 | TSB            | ATCC, United States |
| <i>Shigella flexneri</i> GIM1.238        | TSB            | GCCC, China         |
| <i>Shigella flexneri</i> GIM1.539        | TSB            | GCCC, China         |

|                                                                              |             |                     |
|------------------------------------------------------------------------------|-------------|---------------------|
| <i>Shigella flexneri</i> GIM1.231                                            | TSB         | GCCC, China         |
| <i>Salmonella paratyphi</i> GIM1.235                                         | TSB         | GCCC, China         |
| <i>Shigella sonnei</i> GIM1.424                                              | TSB         | ATCC, United States |
| <i>Shigella sonnei</i> GIM1.239                                              | TSB         | ATCC, United States |
| <i>Salmonella enterica</i> subsp. <i>enterica</i> (ex Kauffmann and Edwards) |             |                     |
| Le Minor and Popoff serovar Vellore ATCC15611                                | LB          | LS-SHOU, China      |
| <i>Vibrio cholerae</i> GIM1.449                                              | TSB         | GCCC, China         |
| <i>Vibrio cholerae</i> B1                                                    | TSB         | LS-SHOU, China      |
| <i>Vibrio parahaemolyticus</i> B2-28                                         | TSB         | LS-SHOU, China      |
| <i>Vibrio parahaemolyticus</i> N2-5                                          | TSB         | LS-SHOU, China      |
| <i>Vibrio parahaemolyticus</i> N9-20                                         | TSB         | LS-SHOU, China      |
| <i>Vibrio alginolyticus</i> ATCC33787                                        | TSB         | ATCC, United States |
| <i>Vibrio fluvialis</i> ATCC33809                                            | Marine 2216 | ATCC, United States |
| <i>Vibrio harveyi</i> ATCC BAA-1117                                          | Marine 2216 | ATCC, United States |
| <i>Vibrio harveyi</i> ATCC33842                                              | Marine 2216 | ATCC, United States |
| <i>Vibrio metschnikovi</i> ATCC700040                                        | TSB         | LS-SHOU, China      |
| <i>Vibrio mimicus</i> bio-56759                                              | Marine 2216 | ATCC, United States |
| <i>Vibrio parahaemolyticus</i> ATCC17802                                     | TSB         | ATCC, United States |
| <i>Vibrio parahaemolyticus</i> ATCC33847                                     | TSB         | ATCC, United States |
| <i>Vibrio vulnificus</i> ATCC27562                                           | Marine 2216 | Biobw, China        |

Note: ATCC: American Type Culture Collection, United States; GCCC, Guangdong Culture Collection Center, Guangzhou, China; IIM, Institute of Industrial Microbiology, Shanghai, China; LS-SHOU, Laboratory stock, Shanghai Ocean University, Shanghai, China.

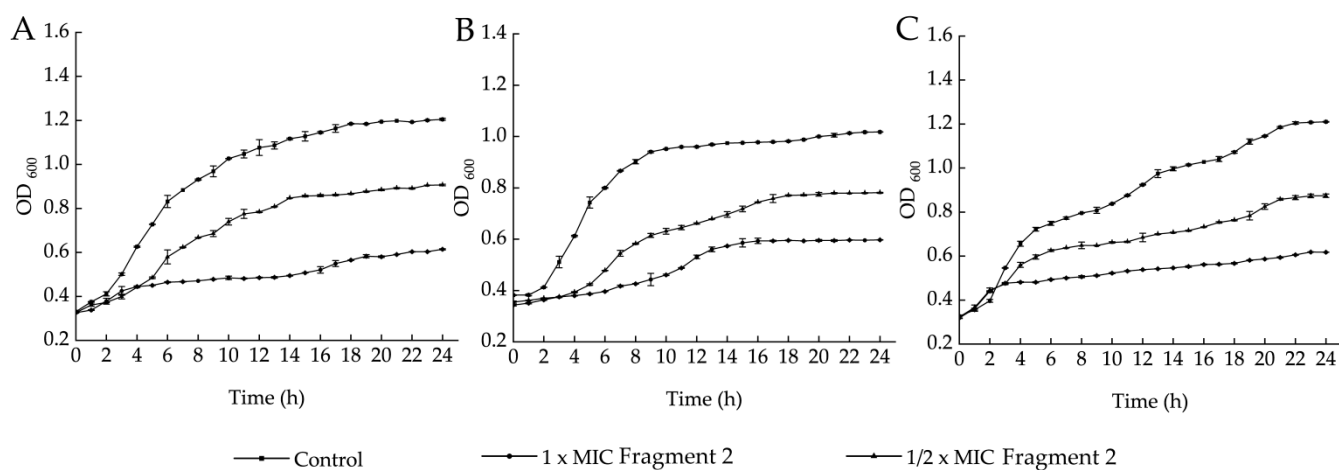

**Figure S1.** Growth curves of target strains treated by Fraction 2 from *A. villosum* Lour. (A–C): *S. aureus* GIM1.441, *B. cereus* Y1, and *V. parahemolyticus* B2-28, respectively. The strains were incubated in the TSB medium at 37 °C.

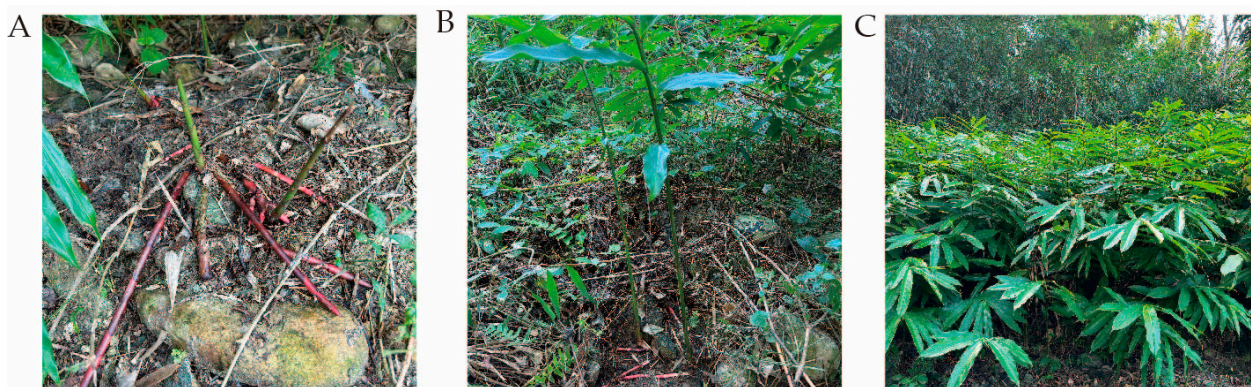

**Figure S2.** The plant of *A. villosum* Lour. (A–C): the different plant growth period.
